# Supplementary material for: Systemic response to rupture of intracranial aneurysms involves expression of specific gene isoforms
Source: PubMed Central journal article supplement (PMC6498486; doi:10.1186/s12967-019-1891-6), 2019-05-02
Supplement: 12967_2019_1891_MOESM3_ESM.pdf [file 12967_2019_1891_MOESM3_ESM.pdf]

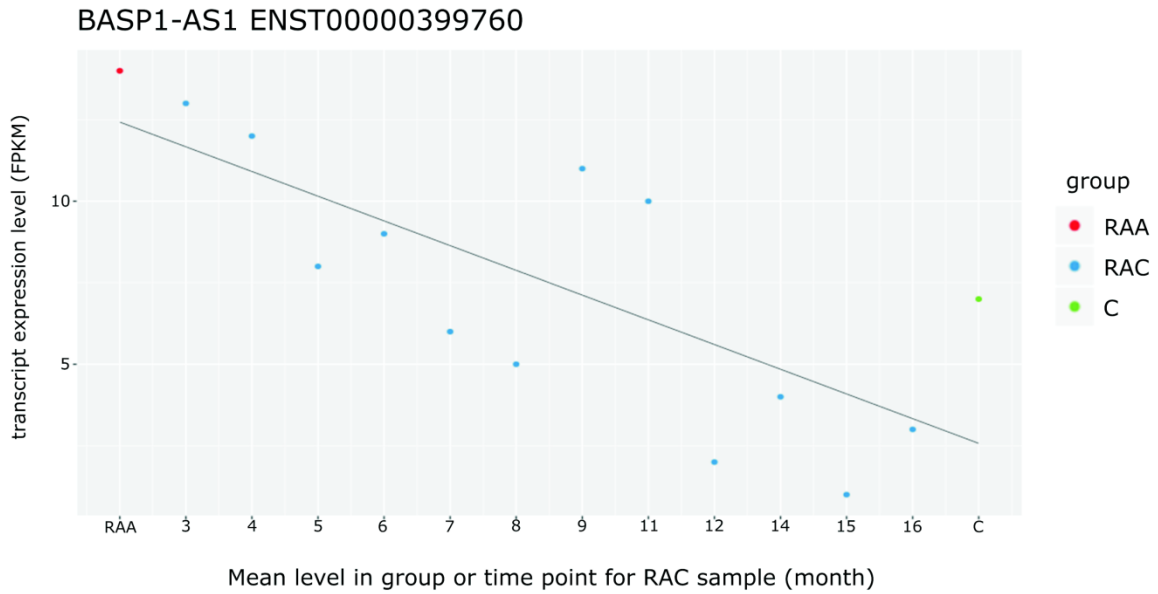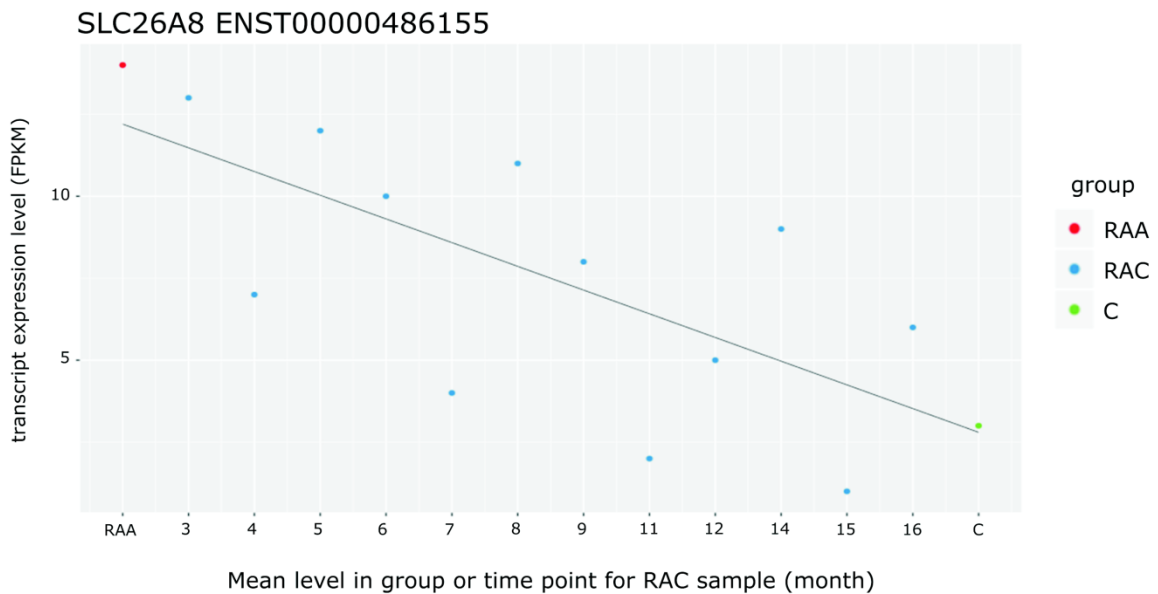

**Time-course of alterations in expression of *BASP1-AS1* and *SLC26A8* after the rupture of an intracranial aneurysm.**

Y-axis represents gene expression level for *BASP1-AS1* and *SLC26A8* presented as log<sub>2</sub> FPKM values. On x-axis mean expression level measured in RAA samples, levels from RAC samples collected at specific time points and mean level measured in C samples are presented, respectively. The association between gene expression and time period of sample collection after the rupture were measured by Spearman's rank correlation coefficient. The correlation coefficient was calculated as  $R=-0.76$  ( $p<0.0025$ ) for *BASP1-AS1* (ENST00000399760) and  $R=-0.72$  ( $p=0.0048$ ) for *SLC26A8* (ENST00000486155).
